# Supplementary material for: DNA methylation epigenotypes in breast cancer molecular subtypes
Source: Breast Cancer Res. 2010 Sep 29;12(5):R77. doi: 10.1186/bcr2721 (PMC3096970; doi:10.1186/bcr2721)
Supplement: Additional file 3 — Table S3. Comparison of quantitative methylation measurements at five CpG loci by both GoldenGate array and pyrosequencing. [file bcr2721-S3.XLS]

## Sheet: Pyrosequencing validation
Suplementary Table S1
JAK3
	Pyrosequencing	GoldenGate
	JAK3	JAK3_P156_R
Sample ID
1	0.37354	0.125
2	0.68222	0.393
3	0.72568	0.432
4	0.8085	0.451
5	0.14902	0.03
6	0.44465	0.052
7	0.75182	0.467
8	0.81524	0.406
9	0.59703	0.245
10	0.66427	0.34
11	0.21259	0.061
12	0.84656	0.589
13	0.85238	0.358
14	0.76451	0.467
15	0.71829	0.444
16	0.75422	0.338
17	0.38069	0.161
18	0.55029	0.503
19	0.48274	0.134
20	0.65245	0.477
Pearson r	0.853553
r2	0.728553
NPY
	Pyrosequencing	GoldenGate
	NPY	NPY_E31_R
Sample ID
1	0.04674	0.05
2	0.09397	0.058
3	0.29498	0.28
4	0.05799	0.225
5	0.09128	0.19
6	0.33804	0.089
7	0.6649	0.509
8	0.17159	0.051
9	0.05537	0.087
10	0.04773	0.115
11	0.07219	0.05
12	0.82316	0.706
13	0.7231	0.562
14	0.77441	0.593
15	0.89425	0.74
16	0.70969	0.262
17	0.32982	0.101
18	0.10543	0.493
19	0.55724	0.248
20	0.73187	0.54
Pearson r	0.815198
r2	0.664547
RASSF1
	Pyrosequencing	GoldenGate
	RASSF1	RASSF1_E116_F
Sample ID
1	0.04229	0.168
2	0.46762	0.305
3	0.04408	0.227
4	0.04069	0.224
5	0.14063	0.158
6	0.05097	0.135
7	0.57371	0.449
8	0.13758	0.226
9	0.0444	0.003
10	0.04034	0.241
11	0.13061	0.15
12	0.67561	0.398
13	0.85164	0.78
14	0.746	0.335
15	0.71417	0.445
16	0.68966	0.66
17	0.04466	0.137
18	0.22669	0.147
19	0.48166	0.152
20	0.27624	0.362
Pearson r	0.808655
r2	0.653923
TAL1
	Pyrosequencing	GoldenGate
	TAL1	TAL1_P594_F
Sample ID
1	0.25728	0.30728
2	0.34036	0.39036
3	0.54131	0.59131
4	0.40237	0.45237
5	0.34001	0.39001
6	0.34442	0.39442
7	0.54053	0.59053
8	0.57442	0.62442
9	0.11378	0.16378
10	0.37781	0.32
11	0.19866	0.186
12	0.28089	0.33089
13	0.24099	0.29099
14	0.29294	0.34294
15	0.47324	0.52324
16	0.38214	0.43214
17	0.37996	0.42996
18	0.29779	0.34779
19	0.50812	0.55812
20	0.81553	0.86553
Pearson r	0.986416
r2	0.973016
HS3ST2
	Pyrosequencing	GoldenGate
	HS3ST2	HS3ST2_P546_F
Sample ID
1	0.09662	0
2	0.09824	0
3	0.07031	0
4	0.0614	0
5	0.18186	0
6	0.08164	0
7	0.11389	0
8	0.09461	0
9	0.13372	0
10	0.09707	0.01
11	0.11848	0.01
12	0.09969	0.004
13	0.05549	0
14	0.0772	0
15	0.25505	0.202
16	0.1419	0
17	0.71057	0.66
18	0.20289	0.055
19	0.26396	0.029
20	0.3987	0.028
Pearson r	0.877911
r2	0.770728
